# Supplementary material
Source: PubMed Central journal article supplement (PMC4857764)
Supplement: NIHMS780728-supplement-JCTC_SI_CM5_2016.pdf [file NIHMS780728-supplement-JCTC_SI_CM5_2016.pdf]

# Evaluation of CM5 Charges for Non-Aqueous Condensed Phase Modeling

## Supporting Information

*Leela S. Dodda, Jonah Z. Vilseck, Kara J. Cutrona and William L. Jorgensen\**

Department of Chemistry, Yale University, New Haven, Connecticut 06520-8107

|                                                                                                                                                                        |      |
|------------------------------------------------------------------------------------------------------------------------------------------------------------------------|------|
| <b>Table S1:</b> Comparison of Previous and Recomputed OPLS-AA Heats of Vaporization (kcal/mol) and Densities (g/cm <sup>3</sup> ) for 22 Organic Liquids at 25°C..... | pp 3 |
| <b>Table S2:</b> Mean Unsigned Errors in Computed Liquid Properties from CM5 Scale Factors Optimized Independently for Each Molecule.....                              | pp 4 |
| <b>Table S3:</b> Computed Heats of Vaporization (kcal/mol) and Densities (g/cm <sup>3</sup> ) for 1.14*CM5 and 1.20*CM5 charges .....                                  | pp 5 |
| <b>Table S4:</b> MUE in GB/SA Free Energies of Hydration Calculated Using CM1A and CM5 Charges Scaled by Different Scale Factors.....                                  | pp 6 |
| <b>Figure S1.</b> Dimers of <i>N</i> -methylacetamide with $\pi$ -type hydrogen bonds observed in 1.14*CM1A pure liquid simulations.....                               | pp 7 |
| <b>Figure S2.</b> Radial distribution functions from OPLS-AA, OPLS/1.14*CM1A and OPLS/1.27*CM5 pure liquid simulations .....                                           | pp 8 |

**Figure S3.** Interpolated MUEs for heats of vaporization to determine an optimal CM5 scaling factor .....pp 9

**Figure S4.** Signed errors of computed liquid properties comparing 1.14\*CM5, 1.20\*CM5, and 1.27\*CM5 scaled CM5 charge models .....pp 10

**Figure S5.** Signed errors in computed free energies of self-solvation with OPLS-AA, 1.14\*CM1A, and 1.20\*CM5 charges .....pp 11

**Figure S6.** MUE in free energies of hydration calculated using GB/SA methodology for CM1A and CM5 charge models with different scaling factors .....pp 12

**Figure S7.** CM<sub>x</sub> MUEs in GB/SA free energies of hydration for compound classes .....pp 13

**Figure S8.** Signed errors in computed heats of vaporization (kcal/mol), density, free energies of hydration (kcal/mol) and free energy of self-solvation (kcal/mol) for molecules in the validation set with OPLS-AA (orange), and 1.20\*CM5 (blue) charges .....pp 14

**Table S1. Comparison of Previous and Recomputed OPLS-AA Heats of Vaporization (kcal/mol) and Densities (g/cm<sup>3</sup>) for 22 Organic Liquids at 25°C.**

| Molecule Name                          | $\Delta H_{vap}$ |             |                    | Density      |              |                    |
|----------------------------------------|------------------|-------------|--------------------|--------------|--------------|--------------------|
|                                        | OPLS-AA          | Previous    | Expt. <sup>a</sup> | OPLS-AA      | Previous     | Expt. <sup>a</sup> |
| acetic acid                            | 12.26            | 12.51       | 12.49              | 1.066        | 1.059        | 1.044              |
| acetone                                | 7.23             | 7.24        | 7.48               | 0.797        | 0.795        | 0.784              |
| acetonitrile                           | 7.57             | 7.59        | 8.01               | 0.759        | 0.765        | 0.776              |
| aniline                                | 11.88            | 12.78       | 12.60              | 1.013        | 1.036        | 1.017              |
| benzonitrile                           | 12.52            | 12.55       | 12.54              | 0.994        | 0.995        | 1.001              |
| cyclohexane                            | 7.56             | 7.80        | 7.86               | 0.752        | 0.755        | 0.774              |
| diethylamine                           | 7.68             | 7.84        | 7.48               | 0.706        | 0.709        | 0.699              |
| diethyl ether                          | 6.90             | 6.80        | 6.56               | 0.707        | 0.708        | 0.708              |
| <i>N,N</i> -dimethylacetamide          | 13.44            | 11.99       | 11.75              | 0.963        | 0.911        | 0.936              |
| ethanethiol                            | 6.67             | 6.79        | 6.58               | 0.859        | 0.855        | 0.833              |
| ethanol                                | 10.29            | 10.29       | 10.11              | 0.798        | 0.799        | 0.785              |
| furan                                  | 6.91             | 6.77        | 6.56               | 0.935        | 0.943        | 0.931              |
| hexane                                 | 7.54             | 8.07        | 7.54               | 0.640        | 0.677        | 0.661              |
| methanol                               | 9.00             | 8.95        | 8.95               | 0.779        | 0.779        | 0.786              |
| methyl acetate                         | 7.99             | 7.74        | 7.72               | 0.943        | 0.929        | 0.928              |
| nitroethane                            | 9.78             | 9.99        | 9.94               | 1.024        | 1.029        | 1.040              |
| <i>N</i> -methylacetamide <sup>b</sup> | 13.87            | 13.55       | 13.30              | 0.917        | 0.907        | 0.894              |
| phenol                                 | 14.58            | 14.09       | 13.82              | 1.052        | 1.050        | 1.058              |
| propylamine                            | 7.90             | 7.80        | 7.47               | 0.719        | 0.717        | 0.711              |
| pyridine                               | 9.76             | 9.80        | 9.61               | 0.968        | 0.977        | 0.978              |
| pyrrole                                | 10.32            | 10.60       | 10.80              | 0.971        | 0.987        | 0.966              |
| tetrahydrofuran                        | 7.52             | 7.49        | 7.61               | 0.853        | 0.855        | 0.884              |
| <b>MUE</b>                             | <b>0.35</b>      | <b>0.20</b> |                    | <b>0.014</b> | <b>0.013</b> |                    |

<sup>a</sup> Refs. 32-40. <sup>b</sup> At 100°C.

**Table S2. Mean Unsigned Errors in Computed Liquid Properties from CM5 Scale Factors Optimized Independently for Each Molecule.**

| <b>Molecule</b>               | <b>Independent Scale Factor</b> | <b>MUE</b>                  |                             |
|-------------------------------|---------------------------------|-----------------------------|-----------------------------|
|                               |                                 | $\Delta H_{vap}$ (kcal/mol) | $\rho$ (g/cm <sup>3</sup> ) |
| acetic acid                   | 1.16                            | 0.05                        | 0.04                        |
| aniline                       | 1.12                            | 0.09                        | 0.01                        |
| benzonitrile                  | 0.93                            | 0.25                        | 0.01                        |
| acetonitrile                  | 1.14                            | 0.04                        | 0.02                        |
| cyclohexane                   | 0.39                            | 0.08                        | 0.02                        |
| diethylamine                  | 1.30                            | 0.13                        | 0.00                        |
| <i>N,N</i> -dimethylacetamide | 0.97                            | 0.20                        | 0.00                        |
| diethyl ether                 | 0.87                            | 0.09                        | 0.02                        |
| methyl acetate                | 0.92                            | 0.18                        | 0.01                        |
| ethanol                       | 1.27                            | 0.08                        | 0.00                        |
| ethanethiol                   | 1.23                            | 0.01                        | 0.03                        |
| furan                         | 0.99                            | 0.00                        | 0.00                        |
| hexane                        | 0.79                            | 0.03                        | 0.02                        |
| acetone                       | 1.08                            | 0.04                        | 0.03                        |
| methanol                      | 1.29                            | 0.27                        | 0.02                        |
| nitroethane                   | 1.09                            | 0.06                        | 0.01                        |
| <i>N</i> -methylacetamide     | 1.01                            | 0.07                        | 0.03                        |
| phenol                        | 1.25                            | 0.07                        | 0.01                        |
| propylamine                   | 1.34                            | 0.68                        | 0.01                        |
| pyridine                      | 1.01                            | 0.06                        | 0.02                        |
| pyrrole                       | 1.16                            | 0.08                        | 0.01                        |
| tetrahydrofuran               | 1.12                            | 0.43                        | 0.03                        |

**Table S3. Computed Heats of Vaporization (kcal/mol) and Densities (g/cm<sup>3</sup>) for 1.14\*CM5 and 1.20\*CM5 charges at 25°C.**

| Molecules                              | $\Delta H_{vap}$ |             |                    | Density      |              |                    |
|----------------------------------------|------------------|-------------|--------------------|--------------|--------------|--------------------|
|                                        | 1.14*CM5         | 1.20*CM5    | Expt. <sup>a</sup> | 1.14*CM5     | 1.20*CM5     | Expt. <sup>a</sup> |
| acetic acid                            | 12.10            | 13.16       | 12.49              | 1.072        | 1.082        | 1.044              |
| aniline                                | 12.89            | 13.69       | 12.60              | 0.816        | 0.828        | 0.784              |
| benzonitrile                           | 14.28            | 14.81       | 12.54              | 0.760        | 0.785        | 0.776              |
| acetonitrile                           | 7.97             | 8.80        | 8.01               | 1.013        | 1.023        | 1.017              |
| cyclohexane                            | 7.69             | 7.56        | 7.86               | 1.008        | 1.011        | 1.001              |
| diethylamine                           | 6.88             | 7.22        | 7.48               | 0.755        | 0.750        | 0.774              |
| <i>N,N</i> -dimethylacetamide          | 13.83            | 14.73       | 11.75              | 0.684        | 0.692        | 0.699              |
| diethyl ether                          | 7.03             | 7.14        | 6.56               | 0.707        | 0.710        | 0.708              |
| methyl acetate                         | 9.17             | 9.56        | 7.72               | 0.962        | 0.981        | 0.936              |
| ethanol                                | 7.91             | 8.96        | 10.11              | 0.852        | 0.854        | 0.833              |
| ethanethiol                            | 6.41             | 6.47        | 6.58               | 0.758        | 0.774        | 0.785              |
| furan                                  | 6.86             | 7.03        | 6.56               | 0.934        | 0.942        | 0.931              |
| hexane                                 | 7.40             | 7.44        | 7.54               | 0.640        | 0.640        | 0.661              |
| acetone                                | 7.91             | 8.36        | 7.48               | 0.727        | 0.747        | 0.786              |
| methanol                               | 6.73             | 7.71        | 8.95               | 0.973        | 0.984        | 0.928              |
| nitroethane                            | 10.35            | 10.96       | 9.94               | 1.041        | 1.053        | 1.040              |
| <i>N</i> -methylacetamide <sup>b</sup> | 15.99            | 17.16       | 13.30              | 0.950        | 0.952        | 0.894              |
| phenol                                 | 12.47            | 13.13       | 13.82              | 1.040        | 1.045        | 1.058              |
| propylamine                            | 6.14             | 6.49        | 7.47               | 0.675        | 0.684        | 0.711              |
| pyridine                               | 10.38            | 10.78       | 9.61               | 0.971        | 0.983        | 0.978              |
| pyrrole                                | 10.38            | 11.37       | 10.80              | 0.969        | 0.983        | 0.966              |
| tetrahydrofuran                        | 7.62             | 7.83        | 7.61               | 0.848        | 0.856        | 0.884              |
| <b>MUE</b>                             | <b>0.89</b>      | <b>1.06</b> |                    | <b>0.022</b> | <b>0.023</b> |                    |

<sup>a</sup> Refs. 32-40. <sup>b</sup> At 100°C.

**Table S4. MUE in GB/SA Free Energies of Hydration Calculated Using CM1A and CM5 Charges Scaled by Different Scale Factors.<sup>a</sup>**

| CM1A         |                | CM5          |             |
|--------------|----------------|--------------|-------------|
| Scale Factor | MUE            | Scale Factor | MUE         |
| 1.00         | 1.19           | 1.00         | 1.82        |
| 1.03         | 1.15           | 1.09         | 1.37        |
| 1.04         | 1.14(4)        | 1.18         | 1.08        |
| <b>1.05</b>  | <b>1.14(3)</b> | 1.19         | 1.08        |
| 1.06         | 1.15           | 1.20         | 1.07        |
| 1.07         | 1.16           | <b>1.21</b>  | <b>1.06</b> |
| 1.08         | 1.17           | 1.22         | 1.06        |
| 1.09         | 1.20           | 1.23         | 1.07        |
| 1.18         | 1.55           | 1.24         | 1.07        |
| 1.27         | 2.10           | 1.27         | 1.10        |
| 1.36         | 2.88           | 1.36         | 1.37        |

<sup>a</sup> Optimal Scale Factors are highlighted in bold.

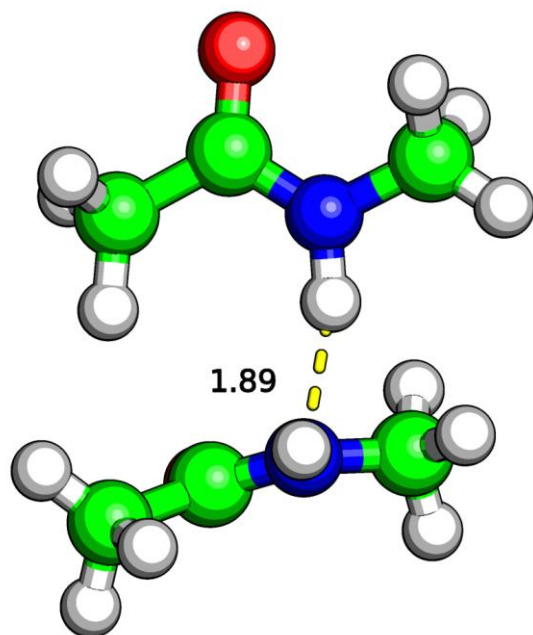

**Figure S1.** Dimers of *N*-methylacetamide with  $\pi$ -type hydrogen bonds observed in 1.14\*CM1A pure liquid simulations.

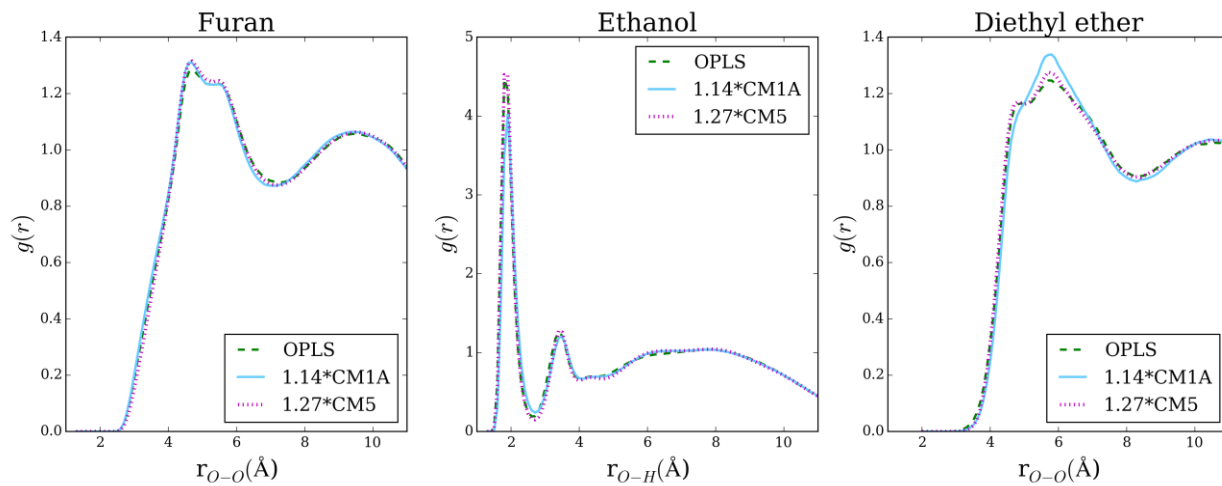

**Figure S2.** Radial distribution functions from OPLS-AA, OPLS/1.14\*CM1A and OPLS/1.27\*CM5 pure liquid simulations.



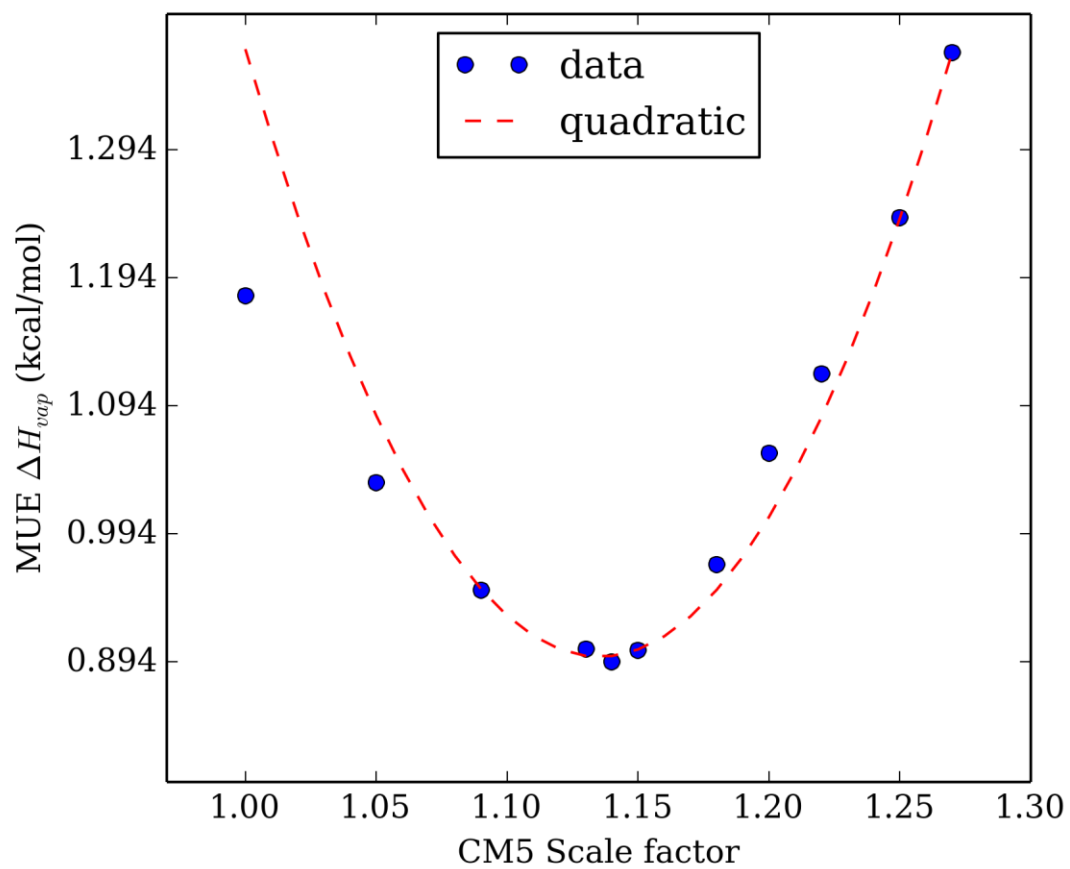

**Figure S3.** Interpolated MUEs for heats of vaporization to determine an optimal CM5 scale factor. The red dashed line represents a quadratic fit of the data.

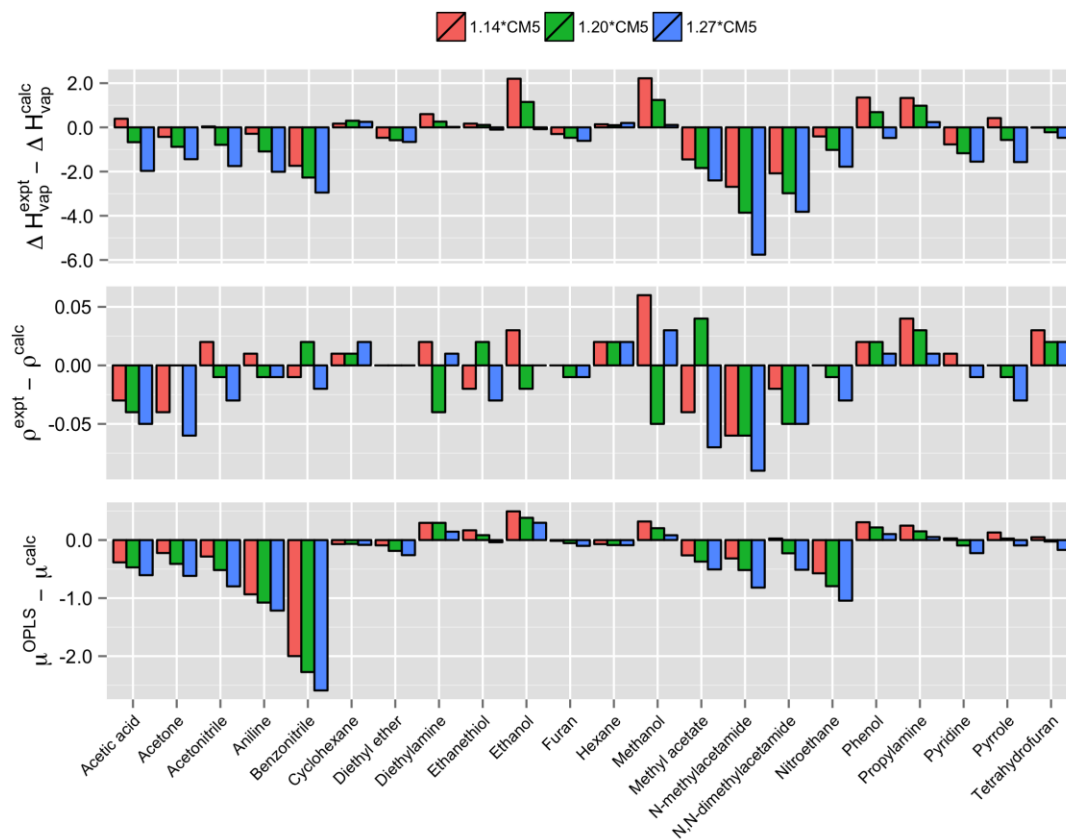

**Figure S4.** Signed errors of computed liquid properties comparing 1.14\*CM5 (orange), 1.20\*CM5 (green) and 1.27\*CM5 (blue) scaled CM5 charge models.

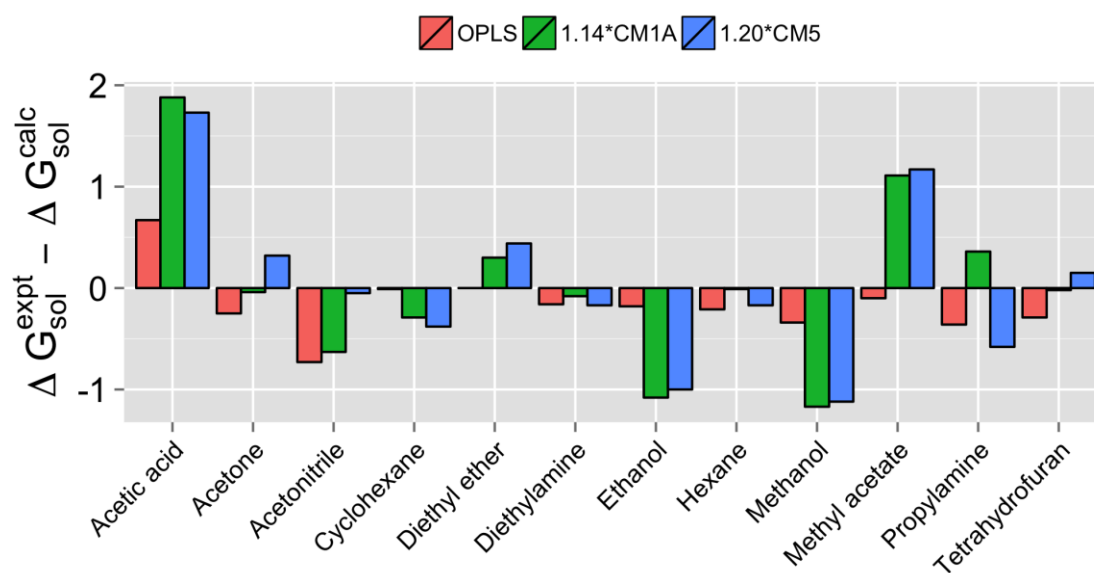

**Figure S5.** Signed errors in computed free energies of self-solvation with OPLS-AA (orange), 1.14\*CM1A (green), and 1.20\*CM5 (blue) charges.

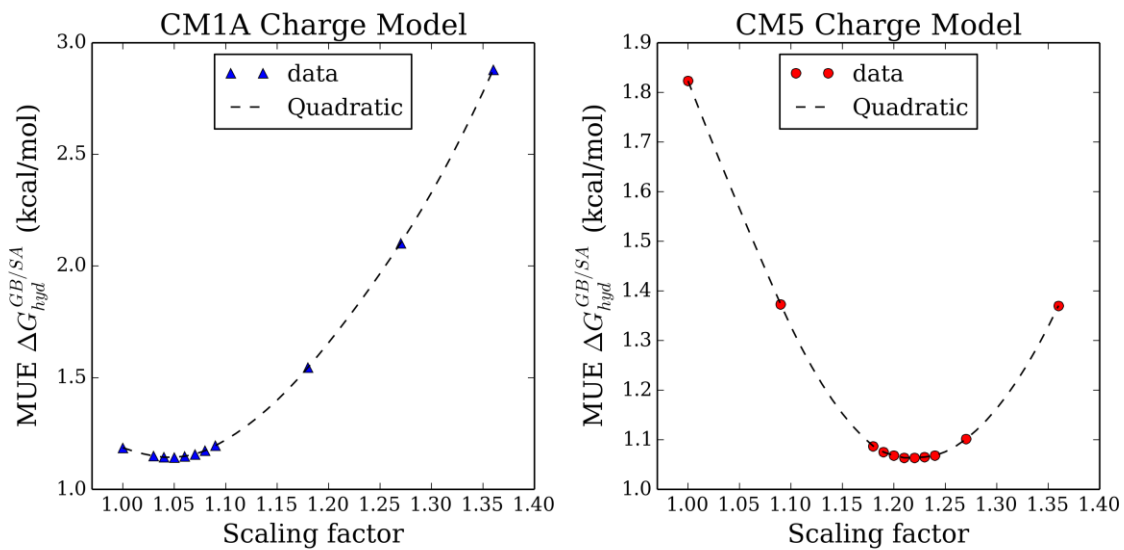

**Figure S6.** MUEs in free energies of hydration calculated using GB/SA methodology for CM1A and CM5 charge models with different scaling factors. Dashed lines represent quadratic fits of the data.

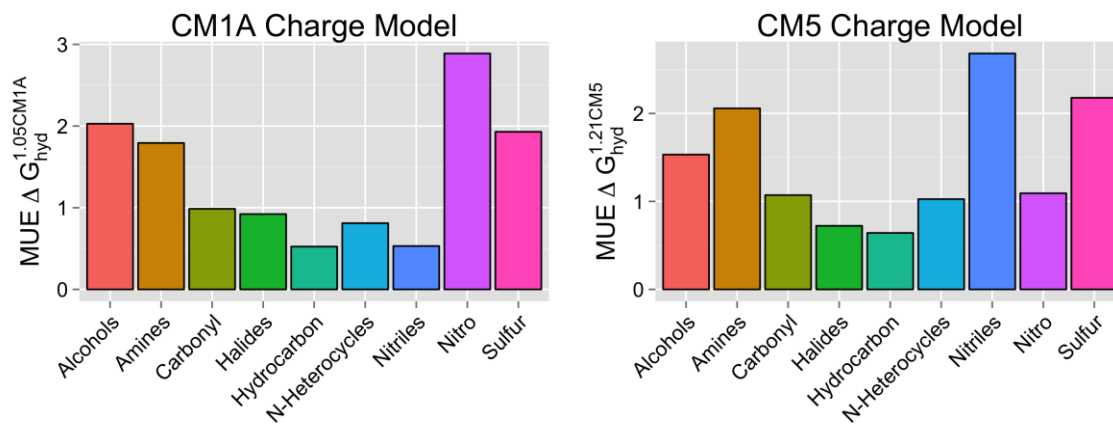

**Figure S7.** CM<sub>x</sub> MUEs in GB/SA free energies of hydration for compound classes.

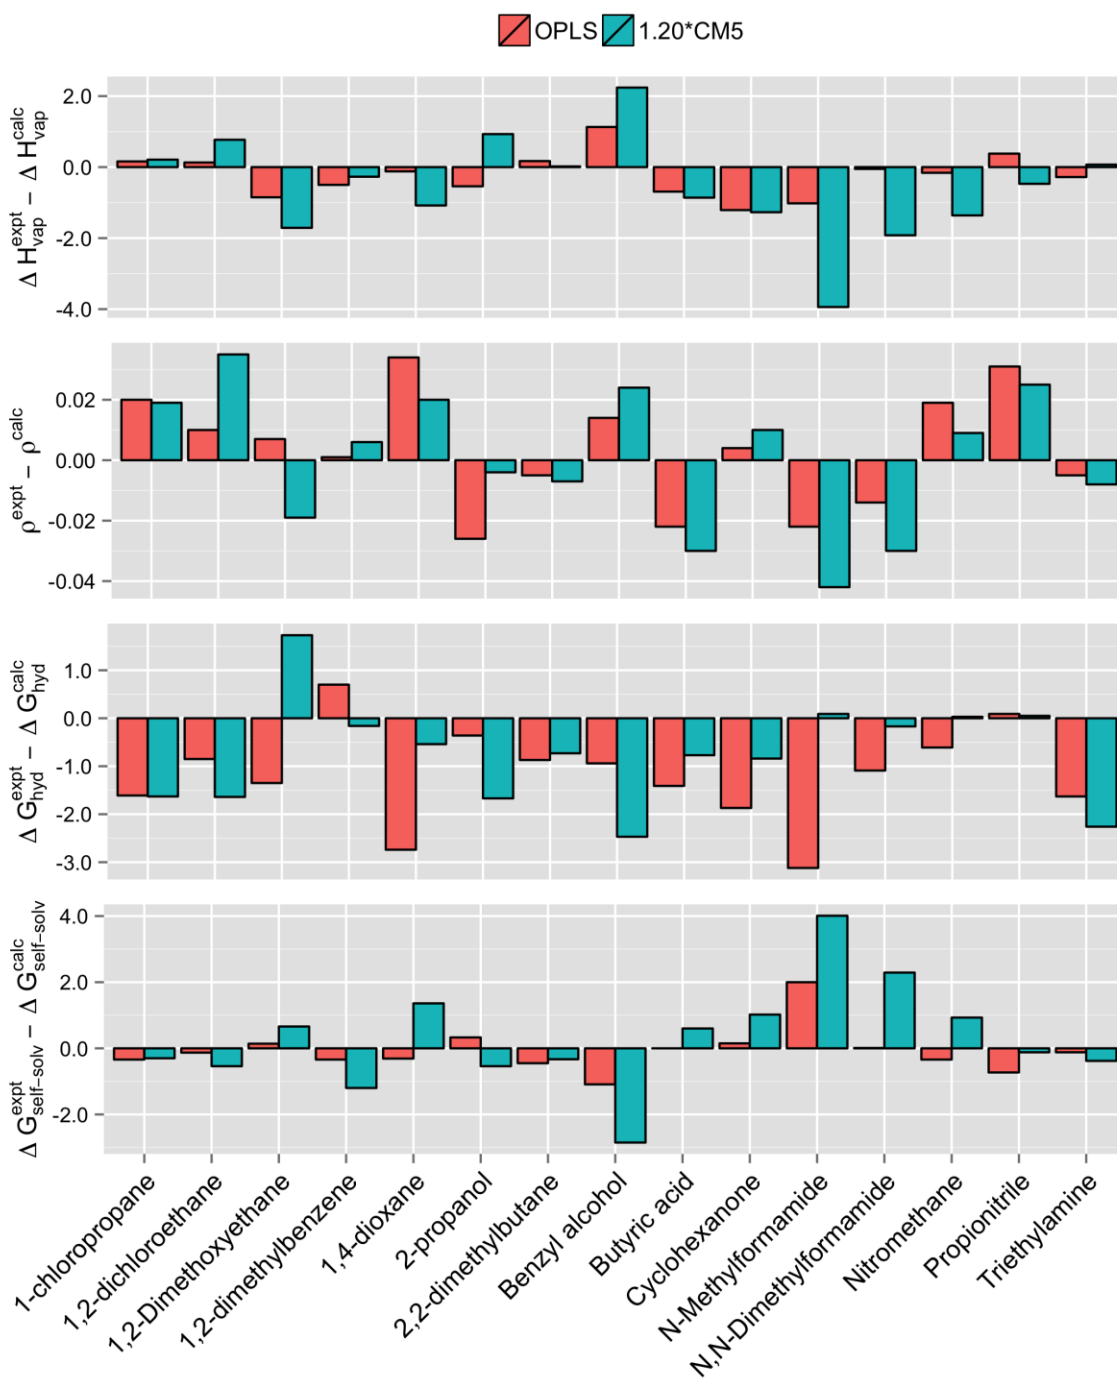

**Figure S8.** Signed errors in computed heats of vaporization (kcal/mol), density, free energies of hydration (kcal/mol) and free energy of self-solvation (kcal/mol) for molecules in the validation set with OPLS-AA (orange), and 1.20\*CM5 (blue) charges.
